# Supplementary material for: An intermolecular hydrogen bond plays a determining role in product selection of a surface confined Schiff-base reaction
Source: Royal Society of Chemistry journal article supplement (doi:10.1039/d1cc01801a), 2021-01-01
Supplement: d1cc01801a1.pdf [file d1cc01801a1.pdf]

# Intermolecular Hydrogen Bond Plays a Determining Role in Product Selection of Surface Confined Schiff-base Reaction

*Huamei Chen,<sup>†</sup> Guangyuan Feng,<sup>†</sup> Qiu Liang,<sup>†</sup> Enbing Zhang,<sup>†</sup> Yongtao Shen,<sup>\*†</sup> Shengbin  
Lei,<sup>\*†</sup> and Wenping Hu<sup>†</sup>*

<sup>†</sup>Tianjin Key Laboratory of Molecular Optoelectronic Sciences, Department of Chemistry,  
School of Science & Collaborative Innovation Center of Chemical Science and Engineering  
(Tianjin), Tianjin University, Tianjin 300072, China

\*E-mail: shengbin.lei@tju.edu.cn,

## 1. Experimental details of surface preparation

All solvents and reagents were purchased from J&K Scientific and TCI. All the chemicals in this work, unless otherwise specified, were used without any further purification.

Self-assembly of **THB**: **THB** was firstly dissolved in DMSO with a concentration of  $2.3 \times 10^{-3}$  mol/L and then the solution was diluted 5 times by octanoic acid. A droplet (5  $\mu$ L) of octanoic acid containing  $4.6 \times 10^{-4}$  mol/L was deposited onto the freshly cleaved surface of highly oriented pyrolytic graphite (HOPG) at room temperature. The adsorbed sub-monolayer was annealed at 100 °C for 30 mins under ambient pressure and then naturally cooled down to room temperature, taken out of the autoclave for characterization.

Sample preparation: Both the **THB** (**THPB**) and **DAB** were first dissolved in DMSO. Then they were diluted 100 times by octanoic acid. A  $\sim 5$   $\mu$ L amount of the mixed solution was deposited on the freshly cleaved surface of HOPG. About 1.0 g of  $\text{CuSO}_4 \cdot 5\text{H}_2\text{O}$  powder was preloaded in the 100 mL Teflon-sealed autoclave to serve as chemical equilibrium regulation agent. The drop-cast samples were positioned in the autoclave as well and heated at 130 °C for 3 h. The sample was taken out and naturally cooled to room temperature, then STM characterization was carried out at the liquid/solid interface after adding a drop of octanoic acid onto the surface.

STM measurements were performed under ambient conditions with mechanically cut Pt/Ir wires (80/20) by using Bruker scanning probe microscopy. All the images were recorded in constant-current mode and shown without further processing. The chemical structure models were built with HyperChem software. The calibration of the STM images was performed by using the HOPG lattice with atomic resolution.



The statistical analysis was estimated by analyzing STM images taken at 30 arbitrarily chosen points for each molar ration (**THB: DAB** =1:1 or **THB: DAB**=2:1) and each concentration. The occupancy of each assemble structure was calculated by dividing the area of each morphological network by the area of all kinds of structures.

## 2. Supplementary figures

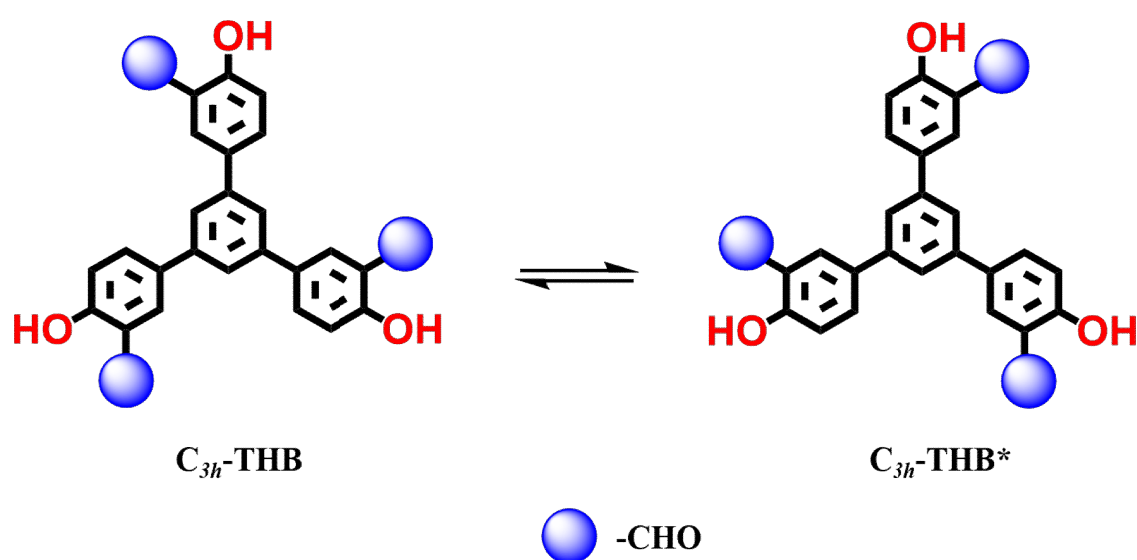

**Figure S1.** The chemical structures of  $C_{3h}$ -THB and  $C_{3h}$ -THB\*.

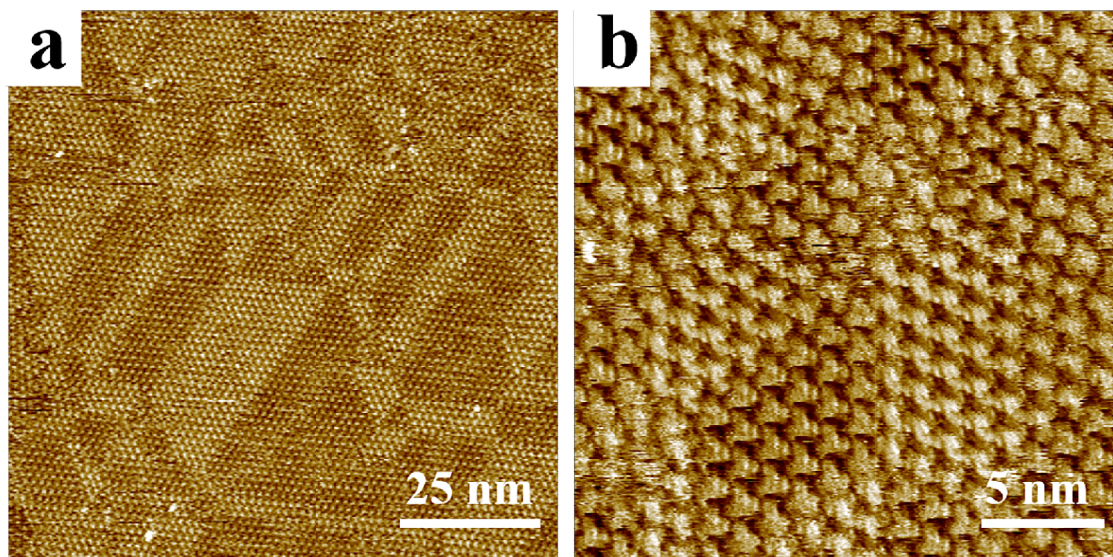

**Figure S2.** Self-assembly of monomer **THB**. (a) Large-scale and (b) high-resolution STM image of assembly of **THB** with the concentration of  $4.6 \times 10^{-4}$  mol/L. Imaging conditions: (a)  $V_{bias} = -0.35$  V,  $I_t = 0.80$  nA. (b)  $V_{bias} = -0.35$  V,  $I_t = 0.19$  nA.

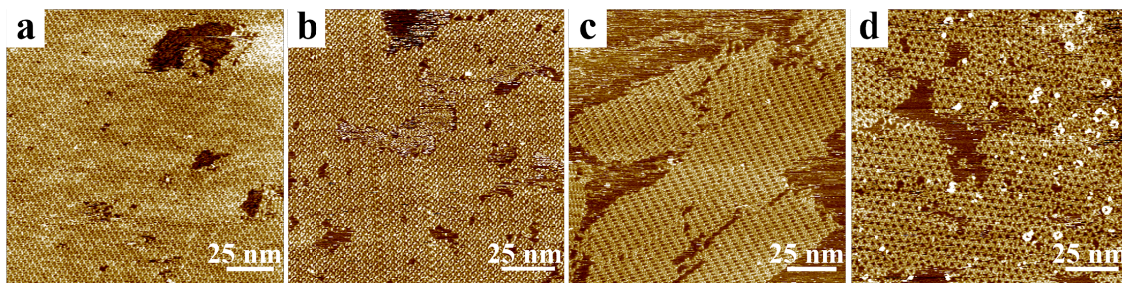

**Figure S3.** Large-scale STM images obtained by on-surface condensation between monomers **DAB** and **THB**. (a) (2+2) Cycle phase I and II (b). (c) Assembly of polymer chains and (d) macrocycles. Imaging conditions: (a)  $V_{bias} = -0.25$  V,  $I_t = 0.45$  nA. (b)  $V_{bias} = -0.45$  V,  $I_t = 0.15$  nA. (c)  $V_{bias} = -0.35$  V,  $I_t = 0.26$  nA. (d)  $V_{bias} = -0.45$  V,  $I_t = 0.09$  nA. (a-b:  $n_{DAB}:n_{THB}=1:2$ ,  $c_{DAB}=3.8 \times 10^{-6}$  mol/L,  $c_{THB}=7.5 \times 10^{-6}$  mol/L; c-d:  $n_{DAB}:n_{THB}=1:1$ ,  $c_{DAB}=1.3 \times 10^{-5}$  mol/L,  $c_{THB}=1.3 \times 10^{-5}$  mol/L).

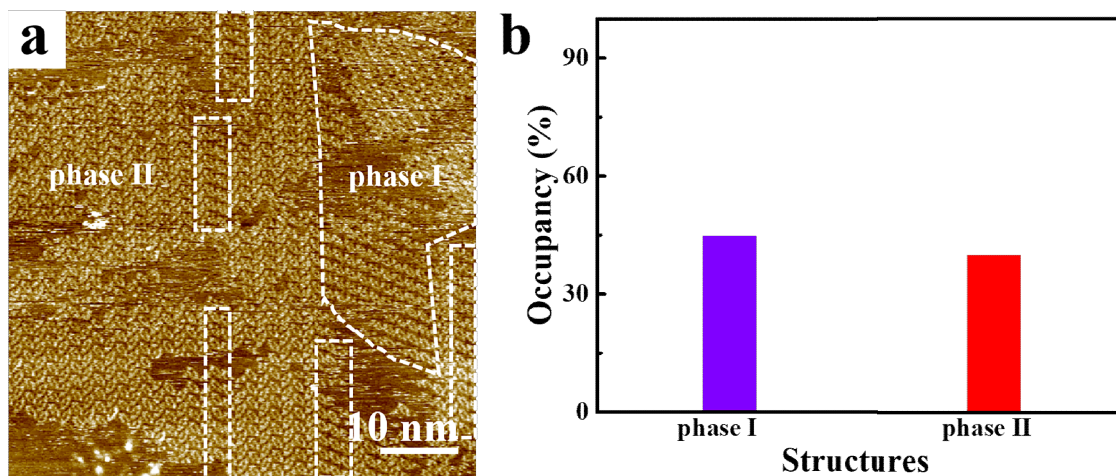

**Figure S4.** (a) STM images of two phases of (2+2) cycles by condensation of **DAB** and **THB**, revealing the coexisting phase I and II. (b) Occupancy of phase I and II. Imaging conditions:  $V_{bias} = -0.35$  V,  $I_t = 0.11$  nA ( $n_{DAB}:n_{THB}=1:2$ ,  $c_{DAB} = 3.8 \times 10^{-6}$  mol/L,  $c_{THB} = 7.5 \times 10^{-6}$  mol/L). The phase I domains were highlighted with white dotted lines.



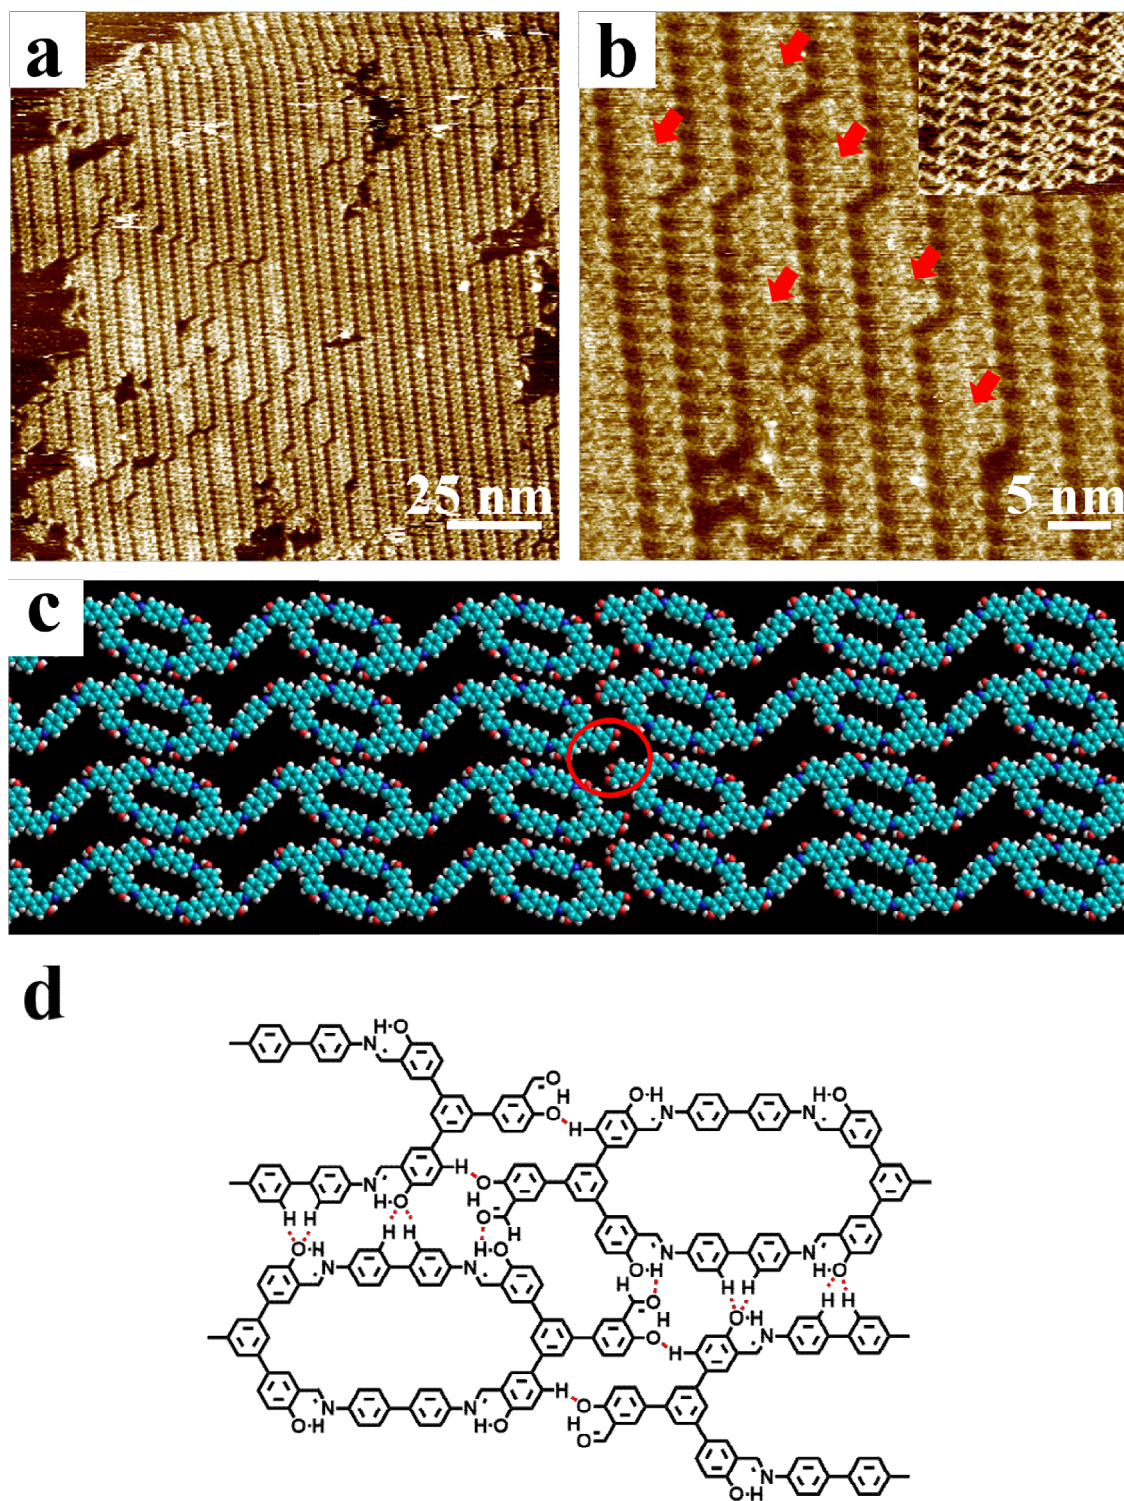

**Figure S5.** (a) STM images of assembly of zig-zag polymer chains. Proposed structural model (c) and an enlarged model of intermolecular hydrogen bonds between polymer chains (d).

Imaging conditions: (a, b)  $V_{bias} = -0.35$  V,  $I_t = 0.08$  nA,  $n_{DAB}:n_{THB}=3:1$ ,  $c_{DAB}= 6.0\times 10^{-6}$  mol/L,  $c_{THB}= 2.0\times 10^{-6}$  mol/L. The red arrows in b indicate the formation of multiple intermolecular hydrogen bonds between unreacted aldehydes at the end of polymer chains. The red dotted lines indicate the existence of multiple intermolecular hydrogen bonds.

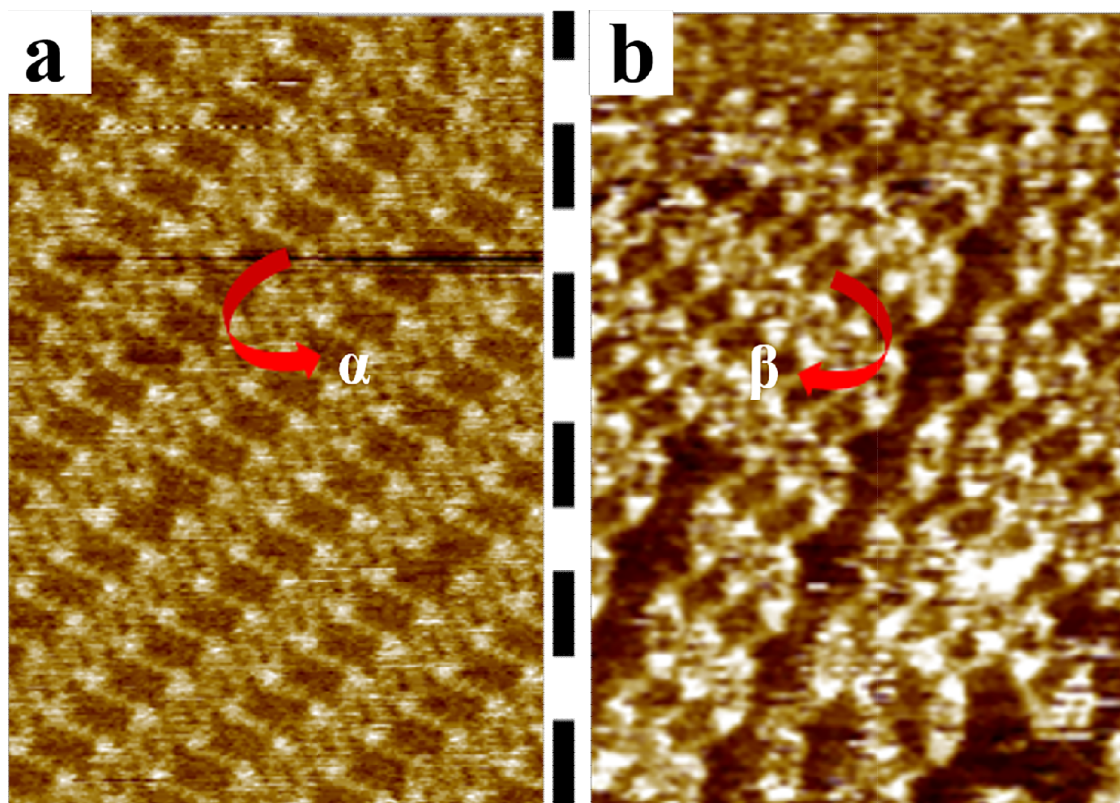

**Figure S6.** STM images of the assembly of homochiral polymer chains, labeled as  $\alpha$  (a) and  $\beta$  (b). Imaging conditions: (a)  $V_{bias} = -0.35$  V,  $I_t = 0.13$  nA. (b)  $V_{bias} = -0.35$  V,  $I_t = 0.22$  nA.

**Table S1.** The relationship of structural diversity and molar ratios (except \*  $c_{\text{THB}}=4.0\times 10^{-6}$  mol/L, the rest:  $c_{\text{THB}}=7.5\times 10^{-6}$  mol/L).

| $n_{\text{Amine}}:n_{\text{Aldehyde}}$ | phase I | phase II | Polymer chains | Macrocycles |
|----------------------------------------|---------|----------|----------------|-------------|
| 1:2                                    | ✓       | ✓        |                |             |
| 1:1                                    | ✓       |          | ✓              | ✓           |
| 3:2                                    |         |          | ✓              | ✓           |
| 3:1                                    |         |          | ✓              | ✓           |
| 3:2(or 3:1)*                           |         |          | ✓              |             |

Keeping the concentration constant of monomer **THB**, Table S2 shows the effect of monomer molar ratios on the product distribution by gradually reducing the proportion of **THB**. Mixing of **DAB** and **THB** with the molar ratio of 1:2 leads to the formation of two assemblies of (2+2) cycles. Statistical analysis revealed the coverage of phase **I** and **II** domains were comparable (44.8%, 40.0%, respectively, Figure S4). Upon increasing the molar ratio of **DAB** and **THB** to 1:1, distinct changes took place in the topological images and two completely new products, zig-zag polymer chains and macrocycles, were observed. Upon further increasing the molar ratio of **DAB** and **THB** to 3:2 (or 3:1), all (2+2) cycles transformed into polymer chains and macrocycles. While under  $4.0\times 10^{-6}$  mol/L of aldehyde concentration, we can exclusively achieve zig-zag polymer chains with the molar ratio of 3:1 (or 3:2). We failed to obtain the exclusive assembly of



the macrocycles though we tried different combinations of concentration and molar ratios. These findings suggested that molar ratio played an important role in the formation of final products.

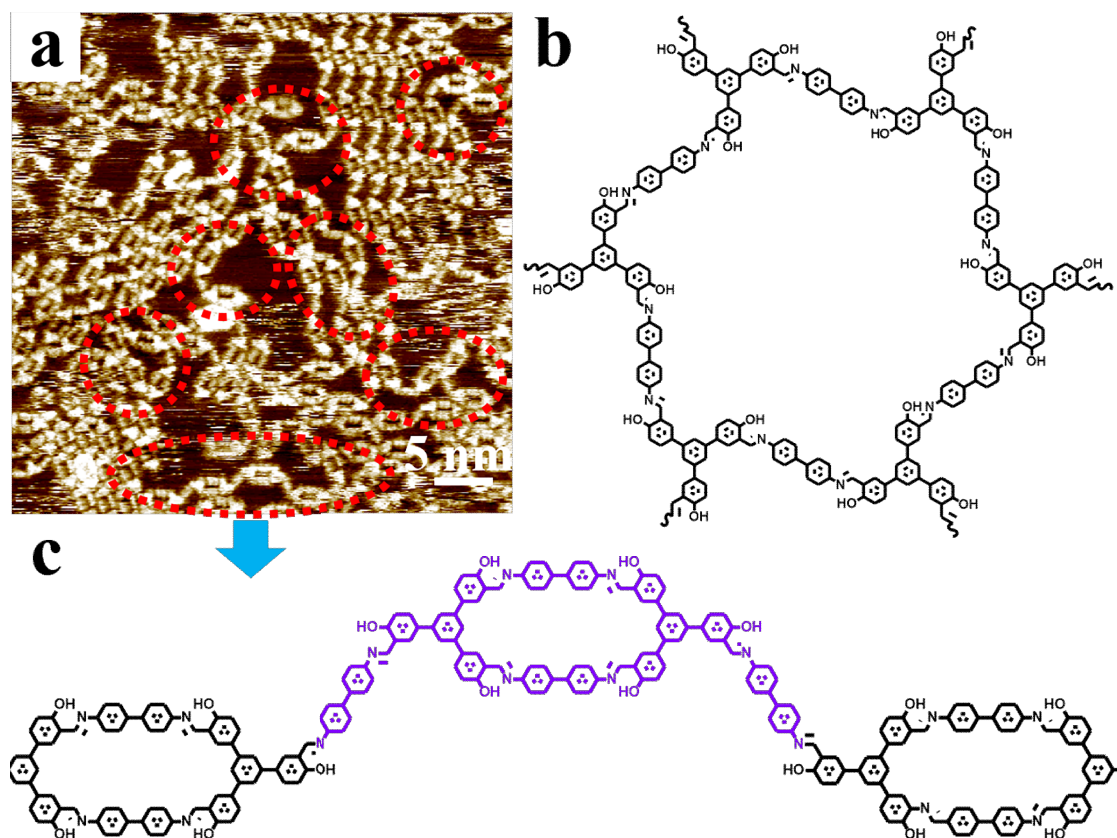

**Figure S7.** STM images (a) and chemical structures (c) of disordered assembly of polymer chains. (b) Envisaged windmill network with exclusively **C<sub>3h</sub>-THB** (or **C<sub>3h</sub>-THB\***) conformer. Imaging conditions:  $V_{bias} = -0.50$  V,  $I_t = 0.10$  nA,  $n_{DAB}:n_{THB} = 1:1$ ,  $c_{DAB} = 1.3 \times 10^{-5}$  mol/L,  $c_{THB} = 1.3 \times 10^{-6}$  mol/L,. The red dashed lines highlight the polymer chains containing *cis* (2+2) cyclic units.

Beyond the four kinds of ordered superstructures, disordered assembly of polymer chains was found on the graphite surface. They were made up of a *cis-trans* diastereomeric mixture of cycles and adopted different morphologies, including zig-zag and curved chains, as seen in Figure S7.

All the observed products contain THB units with  $C_s$ -THB or  $C_s$ -THB\* conformations, order windmill network composed by THB with  $C_{3h}$ -THB ( $C_{3h}$ -THB\*) conformation has never been observed in STM experiments. It clearly demonstrates that THB units have high conformational selectivity toward  $C_s$  conformation during on-surface synthesis.

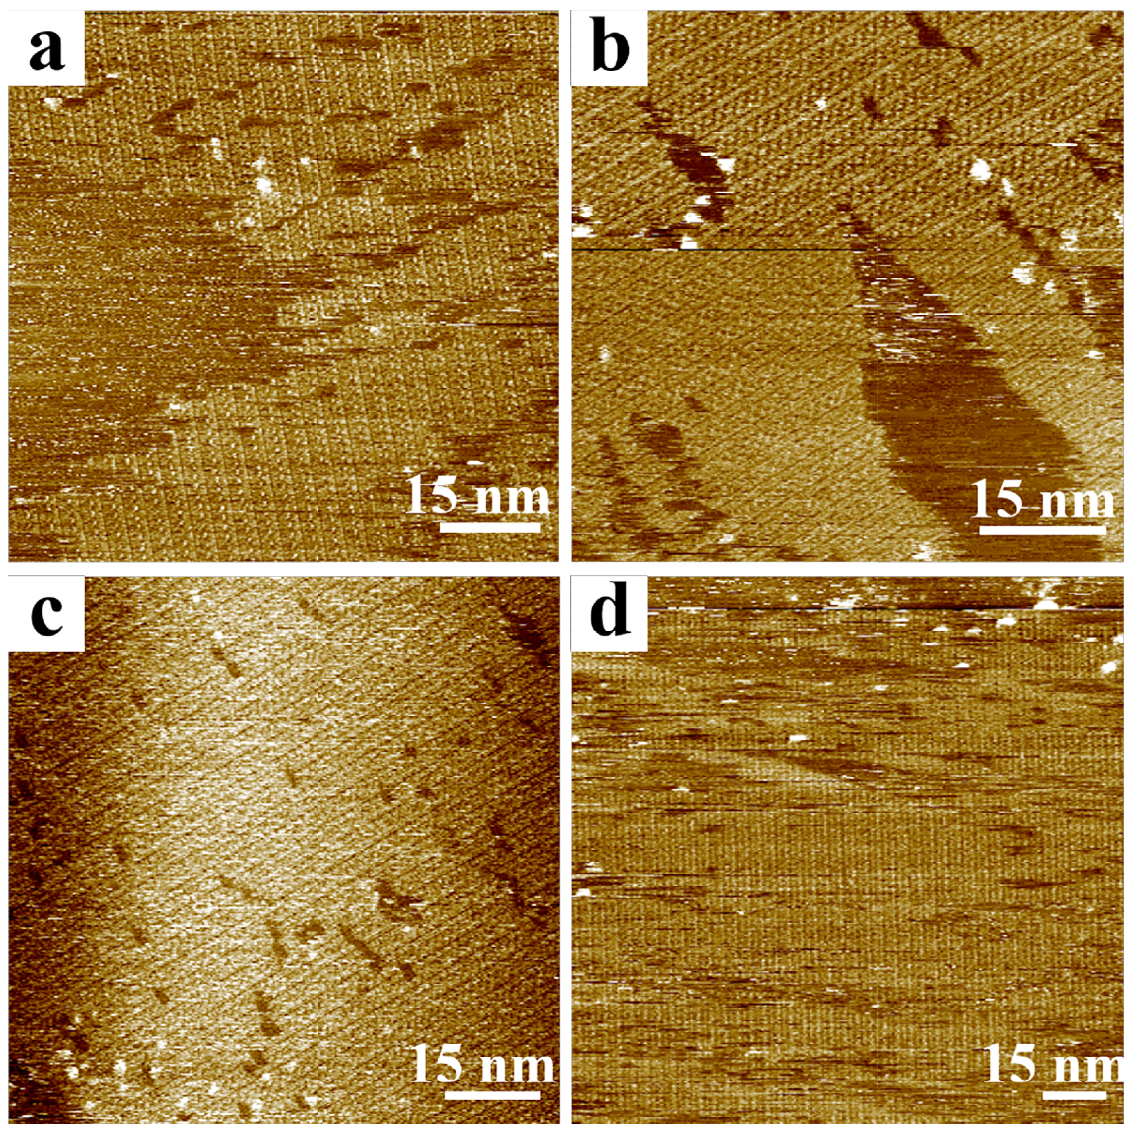

**Figure S8.** STM images obtained by condensation of monomer **DAB** and **THPB** at 130 °C. Imaging conditions: (a)  $V_{bias} = -0.45$  V,  $I_t = 0.10$  nA,  $n_{DAB}:n_{THPB}=1:1$ ,  $c_{DAB}=5.2 \times 10^{-6}$  mol/L. (b)



$V_{bias} = -0.55$  V,  $I_t = 0.27$  nA,  $n_{DAB}:n_{THPB}=6.3:1$ ,  $c_{DAB} = 3.3 \times 10^{-5}$  mol/L. (c)  $V_{bias} = -0.35$  V,  $I_t = 0.13$  nA,  $n_{DAB}:n_{THPB}=10.5:1$ ,  $c_{DAB} = 5.4 \times 10^{-5}$  mol/L. (d)  $V_{bias} = -0.55$  V,  $I_t = 0.24$  nA,  $n_{DAB}:n_{THPB}=21:1$ ,  $c_{DAB} = 1.1 \times 10^{-4}$  mol/L.

**Table S2.** Structural parameters of the assemblies of polymer chains, macrocycles, phase I and II of (2+2) cycles.

| Structures     | a (nm) <sup>a, b</sup> | b (nm) <sup>a, b</sup> | $\gamma$ (deg) <sup>a, b</sup> | N <sup>c</sup> | area (nm <sup>2</sup> ) <sup>d</sup> | D (nm <sup>-2</sup> ) <sup>e</sup> | n <sub>C=N</sub> (nm <sup>-2</sup> ) |
|----------------|------------------------|------------------------|--------------------------------|----------------|--------------------------------------|------------------------------------|--------------------------------------|
| phase I        | 2.6±0.2 (2.54)         | 2.9±0.2 (3.13)         | 64±2° (66)                     | 90             | 6.75                                 | 13.33                              | 0.59                                 |
| phase II       | 2.8±0.2 (3.05)         | 4.9±0.2 (4.71)         | 85±2° (86)                     | 180            | 13.75                                | 13.09                              | 0.58                                 |
| polymer chains | 2.0±0.2 (2.03)         | 4.6±0.2 (4.67)         | 97±2° (98)                     | 102            | 8.94                                 | 11.40                              | 0.67                                 |
| macrocycles    | 5.6±0.2 (5.64)         | 5.6±0.2 (5.63)         | 63±2° (60)                     | 306            | 28.83                                | 10.83                              | 0.62                                 |
| phase III      | 3.3±0.2 (3.25)         | 1.6±0.2 (1.63)         | 70±2° (71)                     | 84             | 4.99                                 | 16.83                              | 0.80                                 |

<sup>a</sup>For the definition of the unit cell refer to Figure 1, 2 and 4. <sup>b</sup> The simulated value is given in parentheses. <sup>c</sup> Number of THB molecule per unit cell. <sup>d</sup> Unit cell area. <sup>e</sup> Network density (number of non-hydrogen atoms/nm<sup>2</sup>)
